# Supplementary material for: Is Autophagy Involved in Pepper Fruit Ripening?
Source: MDPI journal article supplement (doi:10.3390/cells9010106), 2020-01-01
Supplement: s1 [file s1]

**Table S1.** Sequences of primers used in the RTqPCR analysis.

| Name           | Locus        | Sequence 5'-3'        | Primer efficiency (%) | Amplicon Dissociation T <sup>a</sup> |
|----------------|--------------|-----------------------|-----------------------|--------------------------------------|
| <b>Primers</b> |              |                       |                       |                                      |
| S-CaATG4       | LOC107874490 | AGATGCTTGTTGCTCAGGCT  | 112.6                 | 79.9°C                               |
| AS-CaATG4      | LOC107874490 | CTTTTGCTGCGTGCTAATGTT |                       |                                      |
| S-Ca-ATG5      | LOC107857534 | GGAGGAGTGGGAGGAAGTTC  | 109.1                 | 79.2°C                               |
| AS-Ca-ATG5     | LOC107857534 | CCCAATTCGAGGCGCTAAAA  |                       |                                      |
| S-CaATG9       | LOC107870434 | TCTTGTCCTTGACCCGCAG   | 110.2                 | 77.7°C                               |
| AS-CaATG9      | LOC107870434 | GAAGTCCGCAATGAAACGC   |                       |                                      |
| S-CaATG8a      | AY486137.1   | GAAGGTCCTGCTGTCCATCT  | 88.7                  | 81.1°C                               |
| AS-CaATG8a     | AY486137.1   | AGACATGCCTGGAGACGATT  |                       |                                      |
| S-CaLON1       | LOC101264562 | GATACCGGCTCATGTCATGC  | 88.0                  | 74.8°C                               |
| AS-CaLON1      | LOC101264562 | GCAAGGCAGTCAACCAATCA  |                       |                                      |
| S-CaLON2       | LOC101256614 | GCCAGCCCAGAACTTGAATT  | 84.9                  | 77.3°C                               |
| AS-CaLON2      | LOC101256614 | CTCTCGCATCTGGTTTGAGC  |                       |                                      |
| S-CaNBR1       | LOC107875890 | AGTGCGGTTGGTTTATCTGG  | 85.8                  | 76.7°C                               |
| AS-CaNBR1      | LOC107875890 | TCGTTTTACCTGGGATCTGG  |                       |                                      |
| S-CaACTIN      | AY572427.1   | TCTCCTGAAGAGCACCCTGT  | 85.2                  | 77.4°C                               |
| AS-CaACTIN     | AY572427.1   | TACATGGCAGGGACATTGAA  |                       |                                      |
